# Supplementary material for: Novel Universal Recombinant Rotavirus A Vaccine Candidate: Evaluation of Immunological Properties
Source: MDPI journal article supplement (doi:10.3390/v16030438), 2024-03-12
Supplement: s1 [file s1]

| IgG2a to URRA              |                                |                        |                           |                         |                                |                        |                           |
|----------------------------|--------------------------------|------------------------|---------------------------|-------------------------|--------------------------------|------------------------|---------------------------|
| Immunisation group         | Identification number of mouse | Titre                  | log <sub>10</sub> (titre) | Immunisation group      | Identification number of mouse | Titre                  | log <sub>10</sub> (titre) |
| Group 1<br>(Non-immunised) | 1.11                           | 2.05 × 10 <sup>3</sup> | 3.31                      | Group 3<br>(URRA)       | 3.11                           | 3.05 × 10 <sup>3</sup> | 3.48                      |
|                            | 1.12                           | 3.39 × 10 <sup>3</sup> | 3.53                      |                         | 3.12                           | 6.48 × 10 <sup>4</sup> | 4.81                      |
|                            | 1.13                           | 5.14 × 10 <sup>3</sup> | 3.71                      |                         | 3.13                           | 6.12 × 10 <sup>3</sup> | 3.79                      |
|                            | 1.14                           | 1.67 × 10 <sup>3</sup> | 3.22                      |                         | 3.14                           | 3.62 × 10 <sup>4</sup> | 4.56                      |
|                            | 1.15                           | 7.73 × 10 <sup>2</sup> | 2.89                      |                         | 3.15                           | 6.0 × 10 <sup>3</sup>  | 3.78                      |
|                            | 1.16                           | 7.04 × 10 <sup>3</sup> | 3.85                      |                         | 3.16                           | 4.07 × 10 <sup>3</sup> | 3.61                      |
|                            | 1.17                           | 7.95 × 10 <sup>2</sup> | 2.9                       |                         | 3.17                           | 1.87 × 10 <sup>4</sup> | 4.27                      |
|                            | 1.18                           | 1.92 × 10 <sup>4</sup> | 4.28                      |                         | 3.18                           | 9.95 × 10 <sup>3</sup> | 4.0                       |
|                            | 1.19                           | 2.03 × 10 <sup>4</sup> | 4.31                      |                         | 3.19                           | 2.18 × 10 <sup>4</sup> | 4.34                      |
|                            | 1.20                           | 5.64 × 10 <sup>2</sup> | 2.75                      |                         | 3.20                           | 2.11 × 10 <sup>4</sup> | 4.32                      |
|                            | 1.21                           | 7.59 × 10 <sup>2</sup> | 2.88                      |                         | 3.21                           | 5.23 × 10 <sup>3</sup> | 3.72                      |
|                            | 1.22                           | 1.99 × 10 <sup>4</sup> | 4.3                       |                         | 3.22                           | 4.36 × 10 <sup>3</sup> | 3.64                      |
|                            | 1.23                           | 1.08 × 10 <sup>3</sup> | 3.04                      |                         | 3.23                           | 7.97 × 10 <sup>2</sup> | 2.9                       |
|                            | 1.24                           | 7.29 × 10 <sup>2</sup> | 2.86                      |                         | 3.24                           | 1.15 × 10 <sup>4</sup> | 4.06                      |
|                            | 1.25                           | 7.03 × 10 <sup>3</sup> | 3.85                      |                         | 3.25                           | 4.18 × 10 <sup>3</sup> | 3.62                      |
|                            | Median                         | 2.05 × 10 <sup>3</sup> | 3.31                      |                         | Median                         | 6.12 × 10 <sup>3</sup> | 3.79                      |
| Group 2<br>(SPs)           | 2.11                           | 2.37 × 10 <sup>3</sup> | 3.38                      | Group 4<br>(URRA + SPs) | 4.11                           | 4.01 × 10 <sup>2</sup> | 2.6                       |
|                            | 2.12                           | 1.66 × 10 <sup>3</sup> | 3.22                      |                         | 4.12                           | 5.69 × 10 <sup>5</sup> | 5.75                      |
|                            | 2.13                           | 5.73 × 10 <sup>3</sup> | 3.76                      |                         | 4.13                           | 1.02 × 10 <sup>4</sup> | 4.01                      |
|                            | 2.14                           | 5.89 × 10 <sup>2</sup> | 2.77                      |                         | 4.14                           | 3.41 × 10 <sup>3</sup> | 3.53                      |
|                            | 2.15                           | 2.25 × 10 <sup>3</sup> | 3.35                      |                         | 4.15                           | 6.32 × 10 <sup>3</sup> | 3.8                       |
|                            | 2.16                           | 3.4 × 10 <sup>4</sup>  | 4.53                      |                         | 4.16                           | 4.23 × 10 <sup>4</sup> | 4.63                      |
|                            | 2.17                           | 8.38 × 10 <sup>3</sup> | 3.92                      |                         | 4.17                           | 1.4 × 10 <sup>4</sup>  | 4.15                      |
|                            | 2.18                           | 2.11 × 10 <sup>4</sup> | 4.32                      |                         | 4.18                           | 5.26 × 10 <sup>4</sup> | 4.72                      |
|                            | 2.19                           | 2.17 × 10 <sup>4</sup> | 4.34                      |                         | 4.19                           | 6.55 × 10 <sup>3</sup> | 3.82                      |
|                            | 2.20                           | 2.07 × 10 <sup>4</sup> | 4.32                      |                         |                                |                        |                           |
|                            | 2.21                           | 2.31 × 10 <sup>3</sup> | 3.36                      |                         |                                |                        |                           |
|                            | 2.22                           | 4.69 × 10 <sup>3</sup> | 3.67                      |                         |                                |                        |                           |
|                            | 2.23                           | 2.44 × 10 <sup>3</sup> | 3.39                      |                         |                                |                        |                           |
|                            | 2.24                           | 3.06 × 10 <sup>3</sup> | 3.48                      |                         |                                |                        |                           |
|                            | 2.25                           | 2.23 × 10 <sup>3</sup> | 3.35                      |                         |                                |                        |                           |
|                            | Median                         | 3.06 × 10 <sup>3</sup> | 3.48                      |                         | Median                         | 1.02 × 10 <sup>4</sup> | 4.01                      |
