# Supplementary material for: Novel Universal Recombinant Rotavirus A Vaccine Candidate: Evaluation of Immunological Properties
Source: MDPI journal article supplement (doi:10.3390/v16030438), 2024-03-12
Supplement: s1 [file s1]

| IgG3 to URRa               |                                |                        |                           |                         |                                |                        |                           |
|----------------------------|--------------------------------|------------------------|---------------------------|-------------------------|--------------------------------|------------------------|---------------------------|
| Immunisation group         | Identification number of mouse | Titre                  | log <sub>10</sub> (titre) | Immunisation group      | Identification number of mouse | Titre                  | log <sub>10</sub> (titre) |
| Group 1<br>(Non-immunised) | 1.11                           | 6.27 × 10 <sup>1</sup> | 1.8                       | Group 3<br>(URRA)       | 3.11                           | 4.2 × 10 <sup>1</sup>  | 1.62                      |
|                            | 1.12                           | 3.0 × 10 <sup>1</sup>  | 1.48                      |                         | 3.12                           | 3.0 × 10 <sup>1</sup>  | 1.48                      |
|                            | 1.13                           | 3.0 × 10 <sup>1</sup>  | 1.48                      |                         | 3.13                           | 1.77 × 10 <sup>2</sup> | 2.25                      |
|                            | 1.14                           | 1.02 × 10 <sup>2</sup> | 2.01                      |                         | 3.14                           | 2.2 × 10 <sup>2</sup>  | 2.34                      |
|                            | 1.15                           | 8.15 × 10 <sup>1</sup> | 1.91                      |                         | 3.15                           | 8.2 × 10 <sup>1</sup>  | 1.91                      |
|                            | 1.16                           | 3.0 × 10 <sup>1</sup>  | 1.48                      |                         | 3.16                           | 7.48 × 10 <sup>1</sup> | 1.87                      |
|                            | 1.17                           | 2.07 × 10 <sup>2</sup> | 2.32                      |                         | 3.17                           | 4.58 × 10 <sup>2</sup> | 2.66                      |
|                            | 1.18                           | 3.0 × 10 <sup>1</sup>  | 1.48                      |                         | 3.18                           | 3.0 × 10 <sup>1</sup>  | 1.48                      |
|                            | 1.19                           | 3.0 × 10 <sup>1</sup>  | 1.48                      |                         | 3.19                           | 2.53 × 10 <sup>2</sup> | 2.4                       |
|                            | 1.20                           | 9.29 × 10 <sup>2</sup> | 2.97                      |                         | 3.20                           | 1.93 × 10 <sup>2</sup> | 2.29                      |
|                            | 1.21                           | 6.13 × 10 <sup>2</sup> | 2.79                      |                         | 3.21                           | 1.32 × 10 <sup>3</sup> | 3.12                      |
|                            | 1.22                           | 2.23 × 10 <sup>2</sup> | 2.35                      |                         | 3.22                           | 2.19 × 10 <sup>2</sup> | 2.34                      |
|                            | 1.23                           | 2.53 × 10 <sup>2</sup> | 2.4                       |                         | 3.23                           | 1.35 × 10 <sup>2</sup> | 2.13                      |
|                            | 1.24                           | 2.46 × 10 <sup>2</sup> | 2.39                      |                         | 3.24                           | 7.3 × 10 <sup>1</sup>  | 1.86                      |
|                            | 1.25                           | 8.84 × 10 <sup>1</sup> | 1.95                      |                         | 3.25                           | 2.02 × 10 <sup>2</sup> | 2.31                      |
|                            | Median                         | 8.84 × 10 <sup>1</sup> | 1.95                      |                         | Median                         | 1.77 × 10 <sup>2</sup> | 2.25                      |
| Group 2<br>(SPs)           | 2.11                           | 3.0 × 10 <sup>1</sup>  | 1.48                      | Group 4<br>(URRA + SPs) | 4.11                           | 8.23 × 10 <sup>1</sup> | 1.92                      |
|                            | 2.12                           | 3.0 × 10 <sup>1</sup>  | 1.48                      |                         | 4.12                           | 1.51 × 10 <sup>2</sup> | 2.18                      |
|                            | 2.13                           | 3.0 × 10 <sup>1</sup>  | 1.48                      |                         | 4.13                           | 1.69 × 10 <sup>3</sup> | 3.23                      |
|                            | 2.14                           | 5.49 × 10 <sup>1</sup> | 1.74                      |                         | 4.14                           | 5.26 × 10 <sup>2</sup> | 2.72                      |
|                            | 2.15                           | 7.78 × 10 <sup>1</sup> | 1.89                      |                         | 4.15                           | 2.79 × 10 <sup>2</sup> | 2.45                      |
|                            | 2.16                           | 8.76 × 10 <sup>1</sup> | 1.94                      |                         | 4.16                           | 5.79 × 10 <sup>1</sup> | 1.76                      |
|                            | 2.17                           | 4.07 × 10 <sup>1</sup> | 1.61                      |                         | 4.17                           | 8.66 × 10 <sup>1</sup> | 1.94                      |
|                            | 2.18                           | 3.0 × 10 <sup>1</sup>  | 1.48                      |                         | 4.18                           | 7.62 × 10 <sup>2</sup> | 2.88                      |
|                            | 2.19                           | 3.0 × 10 <sup>1</sup>  | 1.48                      |                         | 4.19                           | 8.45 × 10 <sup>1</sup> | 1.93                      |
|                            | 2.20                           | 7.72 × 10 <sup>2</sup> | 2.89                      |                         |                                |                        |                           |
|                            | 2.21                           | 2.45 × 10 <sup>2</sup> | 2.39                      |                         |                                |                        |                           |
|                            | 2.22                           | 2.13 × 10 <sup>2</sup> | 2.33                      |                         |                                |                        |                           |
|                            | 2.23                           | 1.76 × 10 <sup>2</sup> | 2.25                      |                         |                                |                        |                           |
|                            | 2.24                           | 6.79 × 10 <sup>1</sup> | 1.83                      |                         |                                |                        |                           |
|                            | 2.25                           | 3.0 × 10 <sup>1</sup>  | 1.48                      |                         |                                |                        |                           |
|                            | Median                         | 5.49 × 10 <sup>1</sup> | 1.74                      |                         | Median                         | 1.51 × 10 <sup>2</sup> | 2.18                      |
