# Supplementary material for: Novel Universal Recombinant Rotavirus A Vaccine Candidate: Evaluation of Immunological Properties
Source: MDPI journal article supplement (doi:10.3390/v16030438), 2024-03-12
Supplement: s1 [file s1]

| IgG1 to URRa               |                                |                        |                           |                         |                                |                        |                           |
|----------------------------|--------------------------------|------------------------|---------------------------|-------------------------|--------------------------------|------------------------|---------------------------|
| Immunisation group         | Identification number of mouse | Titre                  | log <sub>10</sub> (titre) | Immunisation group      | Identification number of mouse | Titre                  | log <sub>10</sub> (titre) |
| Group 1<br>(Non-immunised) | 1.11                           | 5.06 × 10 <sup>1</sup> | 1.7                       | Group 3<br>(URRA)       | 3.11                           | 5.33 × 10 <sup>2</sup> | 2.73                      |
|                            | 1.12                           | 1.02 × 10 <sup>2</sup> | 2.01                      |                         | 3.12                           | 1.92 × 10 <sup>3</sup> | 3.28                      |
|                            | 1.13                           | 5.25 × 10 <sup>2</sup> | 2.72                      |                         | 3.13                           | 1.42 × 10 <sup>3</sup> | 3.15                      |
|                            | 1.14                           | 8.65 × 10 <sup>1</sup> | 1.94                      |                         | 3.14                           | 6.78 × 10 <sup>2</sup> | 2.83                      |
|                            | 1.15                           | 8.41 × 10 <sup>1</sup> | 1.92                      |                         | 3.15                           | 1.13 × 10 <sup>3</sup> | 3.05                      |
|                            | 1.16                           | 7.4 × 10 <sup>1</sup>  | 1.87                      |                         | 3.16                           | 2.27 × 10 <sup>3</sup> | 3.36                      |
|                            | 1.17                           | 8.25 × 10 <sup>1</sup> | 1.92                      |                         | 3.17                           | 1.18 × 10 <sup>3</sup> | 3.07                      |
|                            | 1.18                           | 5.29 × 10 <sup>1</sup> | 1.72                      |                         | 3.18                           | 6.05 × 10 <sup>2</sup> | 2.78                      |
|                            | 1.19                           | 1.31 × 10 <sup>2</sup> | 2.12                      |                         | 3.19                           | 2.9 × 10 <sup>3</sup>  | 3.46                      |
|                            | 1.20                           | 3.0 × 10 <sup>1</sup>  | 1.48                      |                         | 3.20                           | 2.08 × 10 <sup>3</sup> | 3.32                      |
|                            | 1.21                           | 8.01 × 10 <sup>1</sup> | 1.9                       |                         | 3.21                           | 1.53 × 10 <sup>3</sup> | 3.18                      |
|                            | 1.22                           | 2.48 × 10 <sup>3</sup> | 3.39                      |                         | 3.22                           | 2.39 × 10 <sup>3</sup> | 3.38                      |
|                            | 1.23                           | 2.66 × 10 <sup>2</sup> | 2.43                      |                         | 3.23                           | 2.22 × 10 <sup>2</sup> | 2.35                      |
|                            | 1.24                           | 1.63 × 10 <sup>2</sup> | 2.21                      |                         | 3.24                           | 1.5 × 10 <sup>3</sup>  | 3.18                      |
|                            | 1.25                           | 2.11 × 10 <sup>2</sup> | 2.32                      |                         | 3.25                           | 2.33 × 10 <sup>3</sup> | 3.37                      |
|                            | Median                         | 8.65 × 10 <sup>1</sup> | 1.94                      |                         | Median                         | 1.5 × 10 <sup>3</sup>  | 3.18                      |
| Group 2<br>(SPs)           | 2.11                           | 8.26 × 10 <sup>1</sup> | 1.92                      | Group 4<br>(URRA + SPs) | 4.11                           | 3.38 × 10 <sup>4</sup> | 4.53                      |
|                            | 2.12                           | 5.76 × 10 <sup>2</sup> | 2.76                      |                         | 4.12                           | 4.51 × 10 <sup>4</sup> | 4.65                      |
|                            | 2.13                           | 5.85 × 10 <sup>2</sup> | 2.77                      |                         | 4.13                           | 1.17 × 10 <sup>5</sup> | 5.07                      |
|                            | 2.14                           | 1.13 × 10 <sup>2</sup> | 2.05                      |                         | 4.14                           | 1.89 × 10 <sup>5</sup> | 5.28                      |
|                            | 2.15                           | 1.46 × 10 <sup>2</sup> | 2.16                      |                         | 4.15                           | 1.75 × 10 <sup>4</sup> | 4.24                      |
|                            | 2.16                           | 3.0 × 10 <sup>1</sup>  | 1.48                      |                         | 4.16                           | 2.38 × 10 <sup>3</sup> | 3.38                      |
|                            | 2.17                           | 3.0 × 10 <sup>1</sup>  | 1.48                      |                         | 4.17                           | 1.3 × 10 <sup>3</sup>  | 3.11                      |
|                            | 2.18                           | 8.2 × 10 <sup>1</sup>  | 1.91                      |                         | 4.18                           | 5.93 × 10 <sup>5</sup> | 5.77                      |
|                            | 2.19                           | 1.16 × 10 <sup>2</sup> | 2.06                      |                         | 4.19                           | 5.45 × 10 <sup>4</sup> | 4.74                      |
|                            | 2.20                           | 1.91 × 10 <sup>2</sup> | 2.28                      |                         |                                |                        |                           |
|                            | 2.21                           | 2.81 × 10 <sup>2</sup> | 2.45                      |                         |                                |                        |                           |
|                            | 2.22                           | 4.34 × 10 <sup>2</sup> | 2.64                      |                         |                                |                        |                           |
|                            | 2.23                           | 2.23 × 10 <sup>2</sup> | 2.35                      |                         |                                |                        |                           |
|                            | 2.24                           | 9.98 × 10 <sup>2</sup> | 3.0                       |                         |                                |                        |                           |
|                            | 2.25                           | 7.36 × 10 <sup>1</sup> | 1.87                      |                         |                                |                        |                           |
|                            | Median                         | 1.46 × 10 <sup>2</sup> | 2.16                      |                         | Median                         | 4.51 × 10 <sup>4</sup> | 4.65                      |
