# Supplementary material for: Novel Universal Recombinant Rotavirus A Vaccine Candidate: Evaluation of Immunological Properties
Source: MDPI journal article supplement (doi:10.3390/v16030438), 2024-03-12
Supplement: s1 [file s1]

| Identification number<br>of mouse | Total IgG to URRA      |                           | Total IgG to SPs       |                           |
|-----------------------------------|------------------------|---------------------------|------------------------|---------------------------|
|                                   | Titre                  | log <sub>10</sub> (titre) | Titre                  | log <sub>10</sub> (titre) |
| 4.11                              | 3.38 × 10 <sup>4</sup> | 4.53                      | 7.22 × 10 <sup>3</sup> | 3.86                      |
| 4.12                              | 1.0 × 10 <sup>5</sup>  | 5.0                       | 5.11 × 10 <sup>3</sup> | 3.71                      |
| 4.13                              | 1.41 × 10 <sup>4</sup> | 4.15                      | 2.02 × 10 <sup>3</sup> | 3.31                      |
| 4.14                              | 3.0 × 10 <sup>4</sup>  | 4.48                      | 4.56 × 10 <sup>2</sup> | 2.66                      |
| 4.15                              | 2.71 × 10 <sup>3</sup> | 3.43                      | 1.52 × 10 <sup>3</sup> | 3.18                      |
| 4.16                              | 9.07 × 10 <sup>3</sup> | 3.96                      | 7.94 × 10 <sup>2</sup> | 2.9                       |
| 4.17                              | 1.12 × 10 <sup>3</sup> | 3.05                      | 2.82 × 10 <sup>2</sup> | 2.45                      |
| 4.18                              | 5.67 × 10 <sup>4</sup> | 4.75                      | 1.11 × 10 <sup>4</sup> | 4.04                      |
| 4.19                              | 2.18 × 10 <sup>4</sup> | 4.34                      | 5.77 × 10 <sup>2</sup> | 2.76                      |
| Median                            | 2.18 × 10 <sup>4</sup> | 4.34                      | 1.52 × 10 <sup>3</sup> | 3.18                      |
