# Supplementary material for: Novel Universal Recombinant Rotavirus A Vaccine Candidate: Evaluation of Immunological Properties
Source: MDPI journal article supplement (doi:10.3390/v16030438), 2024-03-12
Supplement: s1 [file s1]

| IgG2b to URRA              |                                |                        |                           |                         |                                |                        |                           |
|----------------------------|--------------------------------|------------------------|---------------------------|-------------------------|--------------------------------|------------------------|---------------------------|
| Immunisation group         | Identification number of mouse | Titre                  | log <sub>10</sub> (titre) | Immunisation group      | Identification number of mouse | Titre                  | log <sub>10</sub> (titre) |
| Group 1<br>(Non-immunised) | 1.11                           | 1.69 × 10 <sup>4</sup> | 4.23                      | Group 3<br>(URRA)       | 3.11                           | 2.18 × 10 <sup>4</sup> | 4.34                      |
|                            | 1.12                           | 4.76 × 10 <sup>4</sup> | 4.68                      |                         | 3.12                           | 4.07 × 10 <sup>4</sup> | 4.61                      |
|                            | 1.13                           | 9.07 × 10 <sup>3</sup> | 3.96                      |                         | 3.13                           | 1.39 × 10 <sup>4</sup> | 4.14                      |
|                            | 1.14                           | 3.28 × 10 <sup>3</sup> | 3.52                      |                         | 3.14                           | 1.09 × 10 <sup>4</sup> | 4.04                      |
|                            | 1.15                           | 2.12 × 10 <sup>4</sup> | 4.33                      |                         | 3.15                           | 5.88 × 10 <sup>3</sup> | 3.77                      |
|                            | 1.16                           | 5.93 × 10 <sup>2</sup> | 2.77                      |                         | 3.16                           | 1.55 × 10 <sup>3</sup> | 3.19                      |
|                            | 1.17                           | 6.51 × 10 <sup>2</sup> | 2.81                      |                         | 3.17                           | 2.08 × 10 <sup>4</sup> | 4.32                      |
|                            | 1.18                           | 4.38 × 10 <sup>3</sup> | 3.64                      |                         | 3.18                           | 2.55 × 10 <sup>2</sup> | 2.41                      |
|                            | 1.19                           | 2.79 × 10 <sup>3</sup> | 3.45                      |                         | 3.19                           | 5.67 × 10 <sup>4</sup> | 4.75                      |
|                            | 1.20                           | 1.17 × 10 <sup>3</sup> | 3.07                      |                         | 3.20                           | 2.01 × 10 <sup>3</sup> | 3.3                       |
|                            | 1.21                           | 1.91 × 10 <sup>3</sup> | 3.28                      |                         | 3.21                           | 5.56 × 10 <sup>3</sup> | 3.75                      |
|                            | 1.22                           | 3.13 × 10 <sup>3</sup> | 3.50                      |                         | 3.22                           | 5.33 × 10 <sup>3</sup> | 3.73                      |
|                            | 1.23                           | 4.5 × 10 <sup>2</sup>  | 2.65                      |                         | 3.23                           | 1.82 × 10 <sup>2</sup> | 2.26                      |
|                            | 1.24                           | 6.61 × 10 <sup>2</sup> | 2.82                      |                         | 3.24                           | 6.91 × 10 <sup>2</sup> | 2.84                      |
|                            | 1.25                           | 2.44 × 10 <sup>2</sup> | 2.39                      |                         | 3.25                           | 7.2 × 10 <sup>2</sup>  | 2.86                      |
|                            | Median                         | 2.79 × 10 <sup>3</sup> | 3.45                      |                         | Median                         | 5.56 × 10 <sup>3</sup> | 3.75                      |
| Group 2<br>(SPs)           | 2.11                           | 1.97 × 10 <sup>4</sup> | 4.29                      | Group 4<br>(URRA + SPs) | 4.11                           | 8.94 × 10 <sup>1</sup> | 1.95                      |
|                            | 2.12                           | 1.16 × 10 <sup>4</sup> | 4.07                      |                         | 4.12                           | 1.63 × 10 <sup>4</sup> | 4.21                      |
|                            | 2.13                           | 1.76 × 10 <sup>4</sup> | 4.25                      |                         | 4.13                           | 1.89 × 10 <sup>4</sup> | 4.28                      |
|                            | 2.14                           | 2.28 × 10 <sup>2</sup> | 2.36                      |                         | 4.14                           | 7.21 × 10 <sup>3</sup> | 3.86                      |
|                            | 2.15                           | 5.32 × 10 <sup>3</sup> | 3.73                      |                         | 4.15                           | 1.18 × 10 <sup>4</sup> | 4.07                      |
|                            | 2.16                           | 6.2 × 10 <sup>2</sup>  | 2.79                      |                         | 4.16                           | 1.55 × 10 <sup>3</sup> | 3.76                      |
|                            | 2.17                           | 3.0 × 10 <sup>1</sup>  | 1.48                      |                         | 4.17                           | 3.83 × 10 <sup>3</sup> | 3.58                      |
|                            | 2.18                           | 7.33 × 10 <sup>3</sup> | 3.87                      |                         | 4.18                           | 5.75 × 10 <sup>4</sup> | 4.76                      |
|                            | 2.19                           | 4.13 × 10 <sup>3</sup> | 3.62                      |                         | 4.19                           | 2.36 × 10 <sup>3</sup> | 3.37                      |
|                            | 2.20                           | 4.57 × 10 <sup>4</sup> | 4.66                      |                         |                                |                        |                           |
|                            | 2.21                           | 3.68 × 10 <sup>3</sup> | 3.57                      |                         |                                |                        |                           |
|                            | 2.22                           | 3.28 × 10 <sup>3</sup> | 3.52                      |                         |                                |                        |                           |
|                            | 2.23                           | 4.23 × 10 <sup>2</sup> | 2.63                      |                         |                                |                        |                           |
|                            | 2.24                           | 2.61 × 10 <sup>2</sup> | 2.41                      |                         |                                |                        |                           |
|                            | 2.25                           | 8.01 × 10 <sup>2</sup> | 2.9                       |                         |                                |                        |                           |
|                            | Median                         | 3.68 × 10 <sup>3</sup> | 3.57                      |                         | Median                         | 7.21 × 10 <sup>3</sup> | 3.86                      |
