# Supplementary material for: Novel Universal Recombinant Rotavirus A Vaccine Candidate: Evaluation of Immunological Properties
Source: MDPI journal article supplement (doi:10.3390/v16030438), 2024-03-12
Supplement: s1 [file s1]

| Antigen | Antigen<br>concentration,<br><i>μg/ml</i> | A <sub>450</sub> value |             |                |
|---------|-------------------------------------------|------------------------|-------------|----------------|
|         |                                           | Replicate 1            | Replicate 2 | Geometric mean |
| URRA    | 10                                        | 1.27                   | 1.32        | 1.30           |
|         | 50                                        | 1.67                   | 1.7         | 1.68           |
|         | 100                                       | 1.67                   | 1.68        | 1.67           |
|         | 200                                       | 1.57                   | 1.71        | 1.64           |
| SPs     | 10                                        | 0.20                   | 0.18        | 0.19           |
|         | 50                                        | 0.65                   | 0.63        | 0.64           |
|         | 100                                       | 0.38                   | 0.38        | 0.38           |
|         | 200                                       | 0.15                   | 0.16        | 0.16           |
