# Supplementary material for: Novel Universal Recombinant Rotavirus A Vaccine Candidate: Evaluation of Immunological Properties
Source: MDPI journal article supplement (doi:10.3390/v16030438), 2024-03-12
Supplement: s1 [file s1]

| IgG to URRA                |                                |                        |                           |                         |                                |                        |                           |
|----------------------------|--------------------------------|------------------------|---------------------------|-------------------------|--------------------------------|------------------------|---------------------------|
| Immunisation group         | Identification number of mouse | Titre                  | log <sub>10</sub> (titre) | Immunisation group      | Identification number of mouse | Titre                  | log <sub>10</sub> (titre) |
| Group 1<br>(Non-immunised) | 1.1                            | 7.36 × 10 <sup>1</sup> | 1.87                      | Group 3<br>(URRA)       | 3.1                            | 1.57 × 10 <sup>2</sup> | 2.2                       |
|                            | 1.2                            | 3.36 × 10 <sup>2</sup> | 2.53                      |                         | 3.2                            | 3.88 × 10 <sup>1</sup> | 1.59                      |
|                            | 1.3                            | 6.56 × 10 <sup>1</sup> | 1.82                      |                         | 3.3                            | 6.47 × 10 <sup>2</sup> | 2.81                      |
|                            | 1.4                            | 7.23 × 10 <sup>1</sup> | 1.86                      |                         | 3.4                            | 6.72 × 10 <sup>1</sup> | 1.83                      |
|                            | 1.5                            | 2.25 × 10 <sup>2</sup> | 2.35                      |                         | 3.5                            | 3.0 × 10 <sup>1</sup>  | 1.48                      |
|                            | 1.6                            | 3.0 × 10 <sup>1</sup>  | 1.48                      |                         | 3.6                            | 3.0 × 10 <sup>1</sup>  | 1.48                      |
|                            | 1.7                            | 3.0 × 10 <sup>1</sup>  | 1.48                      |                         | 3.7                            | 2.33 × 10 <sup>3</sup> | 3.37                      |
|                            | 1.8                            | 6.65 × 10 <sup>1</sup> | 1.82                      |                         | 3.8                            | 1.95 × 10 <sup>2</sup> | 2.29                      |
|                            | 1.9                            | 3.0 × 10 <sup>1</sup>  | 1.48                      |                         | 3.9                            | 1.6 × 10 <sup>2</sup>  | 2.2                       |
|                            | 1.10                           | 7.92 × 10 <sup>1</sup> | 1.9                       |                         | 3.10                           | 2.33 × 10 <sup>2</sup> | 2.37                      |
|                            | Median                         | 6.94 × 10 <sup>1</sup> | 1.84                      |                         | Median                         | 1.59 × 10 <sup>2</sup> | 2.2                       |
| Group 2<br>(SPs)           | 2.1                            | 5.99 × 10 <sup>1</sup> | 1.78                      | Group 4<br>(URRA + SPs) | 4.1                            | 7.06 × 10 <sup>2</sup> | 2.85                      |
|                            | 2.2                            | 5.34 × 10 <sup>1</sup> | 1.73                      |                         | 4.2                            | 6.31 × 10 <sup>2</sup> | 2.8                       |
|                            | 2.3                            | 1.98 × 10 <sup>2</sup> | 2.3                       |                         | 4.3                            | 2.23 × 10 <sup>2</sup> | 2.35                      |
|                            | 2.4                            | 7.64 × 10 <sup>1</sup> | 1.88                      |                         | 4.4                            | 2.68 × 10 <sup>2</sup> | 2.43                      |
|                            | 2.5                            | 7.14 × 10 <sup>1</sup> | 1.85                      |                         | 4.5                            | 2.12 × 10 <sup>2</sup> | 2.33                      |
|                            | 2.6                            | 3.0 × 10 <sup>1</sup>  | 1.48                      |                         | 4.6                            | 1.9 × 10 <sup>3</sup>  | 3.28                      |
|                            | 2.7                            | 7.69 × 10 <sup>1</sup> | 1.89                      |                         | 4.7                            | 7.78 × 10 <sup>2</sup> | 2.89                      |
|                            | 2.8                            | 1.84 × 10 <sup>2</sup> | 2.26                      |                         | 4.8                            | 1.96 × 10 <sup>2</sup> | 2.29                      |
|                            | 2.9                            | 5.97 × 10 <sup>1</sup> | 1.78                      |                         | 4.9                            | 2.24 × 10 <sup>2</sup> | 2.35                      |
|                            | 2.10                           | 6.32 × 10 <sup>1</sup> | 1.8                       |                         | 4.10                           | 6.39 × 10 <sup>2</sup> | 2.81                      |
|                            | Median                         | 6.73 × 10 <sup>1</sup> | 1.83                      |                         | Median                         | 4.5 × 10 <sup>2</sup>  | 2.61                      |
