# Supplementary material for: Novel Universal Recombinant Rotavirus A Vaccine Candidate: Evaluation of Immunological Properties
Source: MDPI journal article supplement (doi:10.3390/v16030438), 2024-03-12
Supplement: s1 [file s1]

| Antigen | Antigen concentration,<br><i>μg/ml</i> | A <sub>450</sub> value |             |                |
|---------|----------------------------------------|------------------------|-------------|----------------|
|         |                                        | Replicate 1            | Replicate 2 | Geometric mean |
| URRA    | 10                                     | 1.78                   | 1.72        | 1.74           |
|         | 50                                     | 1.84                   | 1.8         | 1.82           |
|         | 100                                    | 1.88                   | 1.73        | 1.80           |
|         | 200                                    | 1.97                   | 1.88        | 1.93           |
| SPs     | 10                                     | 0.21                   | 0.21        | 0.21           |
|         | 50                                     | 0.53                   | 0.52        | 0.52           |
|         | 100                                    | 0.36                   | 0.35        | 0.36           |
|         | 200                                    | 0.18                   | 0.17        | 0.17           |
