# Supplementary material for: Novel Universal Recombinant Rotavirus A Vaccine Candidate: Evaluation of Immunological Properties
Source: MDPI journal article supplement (doi:10.3390/v16030438), 2024-03-12
Supplement: s1 [file s1]

| IgG to URRA                |                                |                        |                           |                         |                                |                        |                           |
|----------------------------|--------------------------------|------------------------|---------------------------|-------------------------|--------------------------------|------------------------|---------------------------|
| Immunisation group         | Identification number of mouse | Titre                  | log <sub>10</sub> (titre) | Immunisation group      | Identification number of mouse | Titre                  | log <sub>10</sub> (titre) |
| Group 1<br>(Non-immunised) | 1.11                           | 2.49 × 10 <sup>2</sup> | 2.4                       | Group 3<br>(URRA)       | 3.11                           | 2.23 × 10 <sup>3</sup> | 3.35                      |
|                            | 1.12                           | 1.47 × 10 <sup>3</sup> | 3.17                      |                         | 3.12                           | 6.69 × 10 <sup>3</sup> | 3.83                      |
|                            | 1.13                           | 2.05 × 10 <sup>2</sup> | 2.31                      |                         | 3.13                           | 1.99 × 10 <sup>3</sup> | 3.30                      |
|                            | 1.14                           | 4.8 × 10 <sup>2</sup>  | 2.68                      |                         | 3.14                           | 5.02 × 10 <sup>3</sup> | 3.7                       |
|                            | 1.15                           | 1.47 × 10 <sup>2</sup> | 2.17                      |                         | 3.15                           | 1.21 × 10 <sup>3</sup> | 3.08                      |
|                            | 1.16                           | 8.62 × 10 <sup>1</sup> | 1.94                      |                         | 3.16                           | 2.16 × 10 <sup>3</sup> | 3.33                      |
|                            | 1.17                           | 8.82 × 10 <sup>1</sup> | 1.95                      |                         | 3.17                           | 5.29 × 10 <sup>3</sup> | 3.72                      |
|                            | 1.18                           | 8.02 × 10 <sup>1</sup> | 1.9                       |                         | 3.18                           | 5.43 × 10 <sup>2</sup> | 2.73                      |
|                            | 1.19                           | 7.52 × 10 <sup>1</sup> | 1.88                      |                         | 3.19                           | 4.58 × 10 <sup>3</sup> | 3.66                      |
|                            | 1.20                           | 8.07 × 10 <sup>1</sup> | 1.91                      |                         | 3.20                           | 4.04 × 10 <sup>3</sup> | 3.61                      |
|                            | 1.21                           | 3.29 × 10 <sup>2</sup> | 2.52                      |                         | 3.21                           | 1.33 × 10 <sup>3</sup> | 3.12                      |
|                            | 1.22                           | 2.67 × 10 <sup>2</sup> | 2.43                      |                         | 3.22                           | 1.19 × 10 <sup>3</sup> | 3.08                      |
|                            | 1.23                           | 2.18 × 10 <sup>2</sup> | 2.34                      |                         | 3.23                           | 1.03 × 10 <sup>3</sup> | 3.01                      |
|                            | 1.24                           | 2.61 × 10 <sup>2</sup> | 2.42                      |                         | 3.24                           | 2.46 × 10 <sup>2</sup> | 2.39                      |
|                            | 1.25                           | 3.0 × 10 <sup>1</sup>  | 1.48                      |                         | 3.25                           | 6.69 × 10 <sup>2</sup> | 2.83                      |
|                            | Median                         | 2.05 × 10 <sup>2</sup> | 2.31                      |                         | Median                         | 1.99 × 10 <sup>3</sup> | 3.3                       |
| Group 2<br>(SPs)           | 2.11                           | 2.54 × 10 <sup>2</sup> | 2.4                       | Group 4<br>(URRA + SPs) | 4.11                           | 3.38 × 10 <sup>4</sup> | 4.53                      |
|                            | 2.12                           | 1.95 × 10 <sup>2</sup> | 2.29                      |                         | 4.12                           | 1.0 × 10 <sup>5</sup>  | 5.0                       |
|                            | 2.13                           | 2.35 × 10 <sup>2</sup> | 2.37                      |                         | 4.13                           | 1.41 × 10 <sup>4</sup> | 4.15                      |
|                            | 2.14                           | 2.52 × 10 <sup>2</sup> | 2.4                       |                         | 4.14                           | 3.0 × 10 <sup>4</sup>  | 4.48                      |
|                            | 2.15                           | 2.62 × 10 <sup>2</sup> | 2.42                      |                         | 4.15                           | 2.71 × 10 <sup>3</sup> | 3.43                      |
|                            | 2.16                           | 8.3 × 10 <sup>1</sup>  | 1.92                      |                         | 4.16                           | 9.07 × 10 <sup>3</sup> | 3.96                      |
|                            | 2.17                           | 5.47 × 10 <sup>1</sup> | 1.74                      |                         | 4.17                           | 1.12 × 10 <sup>3</sup> | 3.05                      |
|                            | 2.18                           | 8.97 × 10 <sup>1</sup> | 1.95                      |                         | 4.18                           | 5.67 × 10 <sup>4</sup> | 4.75                      |
|                            | 2.19                           | 6.75 × 10 <sup>1</sup> | 1.83                      |                         | 4.19                           | 2.18 × 10 <sup>4</sup> | 4.34                      |
|                            | 2.20                           | 2.34 × 10 <sup>2</sup> | 2.37                      |                         |                                |                        |                           |
|                            | 2.21                           | 2.03 × 10 <sup>2</sup> | 2.31                      |                         |                                |                        |                           |
|                            | 2.22                           | 3.97 × 10 <sup>2</sup> | 2.6                       |                         |                                |                        |                           |
|                            | 2.23                           | 2.49 × 10 <sup>2</sup> | 2.4                       |                         |                                |                        |                           |
|                            | 2.24                           | 1.31 × 10 <sup>2</sup> | 2.12                      |                         |                                |                        |                           |
|                            | 2.25                           | 8.76 × 10 <sup>1</sup> | 1.94                      |                         |                                |                        |                           |
|                            | Median                         | 2.03 × 10 <sup>2</sup> | 2.31                      |                         | Median                         | 2.18 × 10 <sup>4</sup> | 4.34                      |
